# Supplementary material for: Restoring theta synchronization reverses social deficits in Shank2 mutant mice
Source: Research Square preprint supplement (doi:10.21203/rs.3.rs-5800769/v1), 2025-02-27
Supplement: Supplementary file 1 [file 0aff2f0a91b9657c4378afbd.xlsx]

## Sheet: Sheet1
Table S1. Statistical results
Figure 1
Number	Comparison	N	Parameter	Statistical tests and significance
c	WT vs KO	16,14	distribution of all behaviors	Chi-square;p=0.0002
d	WT vs KO	16,14	social interaction time	Mann Whitney, p<0.0001
	Trial type (WT-WT, WT-KO, KO-KO, KO-WT)	WT-WT: 70, WT-KO:73, KO-KO:80, KO-WT: 73	social interaction time	Two-way ANOVA; Main effect of self-genotype p<0.001; Main effect of the other genotype p<0.001; Main effect of self x other p=0.111
	WT-WT vs WT-KO	70, 73	social interaction time	Mann Whitney, p=0.0002
	WT-KO vs KO-WT	73, 73	social interaction time	Mann Whitney, p=0.7058
	KO-WT vs KO-KO	73, 80	social interaction time	Mann Whitney, p=0.7058
e	KO-WT vs KO-KO	73, 80	approach frequency	Mann Whitney, p<0.0001
	KO-WT vs KO-KO	73, 80	chasing frequency	Mann Whitney, p=0.0442
	KO-WT vs KO-KO	73, 80	uni-sniffing frequency	Mann Whitney, p=0.0035
Figure 2
Number	Comparison	N	Parameter	Statistical tests and significance
b.Left	Trial type (WT-WT, WT-KO, KO-KO)	WT-WT: 35, WT-KO:66, KO-KO:34)	Theta Pearson correlation coefficient	Kruskal Wallis; p=0.0061
	WT-WT vs WT-KO	35, 66	Theta Pearson correlation coefficient	Dunn's multipe comparisons; p>0.9999
	WT-WT vs KO-KO	35,34	Theta Pearson correlation coefficient	Dunn's multipe comparisons; p=0.0072
	WT-KO vs KO-KO	66,34	Theta Pearson correlation coefficient	Dunn's multipe comparisons; p=0.031
b.Middle	Trial type (WT-WT, WT-KO, KO-KO)	WT-WT: 35, WT-KO:66, KO-KO:34)	Beta Pearson correlation coefficient	Kruskal Wallis; p=0.0161
	WT-WT vs WT-KO	35, 66	Beta Pearson correlation coefficient	Dunn's multipe comparisons; p=0.4236
	WT-WT vs KO-KO	35,34	Beta Pearson correlation coefficient	Dunn's multipe comparisons; p=0.0124
	WT-KO vs KO-KO	66,34	Beta Pearson correlation coefficient	Dunn's multipe comparisons; p=0.2092
b.Right	Trial type (WT-WT, WT-KO, KO-KO)	WT-WT: 35, WT-KO:66, KO-KO:34)	Low gamma Pearson correlation coefficient	Kruskal Wallis; p=0.0432
	WT-WT vs WT-KO	35, 66	Low gamma Pearson correlation coefficient	Dunn's multipe comparisons; p=0.4975
	WT-WT vs KO-KO	35,34	Low gamma Pearson correlation coefficient	Dunn's multipe comparisons; p=0.0366
	WT-KO vs KO-KO	66,34	Low gamma Pearson correlation coefficient	Dunn's multipe comparisons; p=0.4119
c	WT-WT	70	Social interaction time vs Theta Pearson correlation coefficient	Simple linear regression; p=0.0223, r2=0.074
	WT-KO	132	Social interaction time vs Theta Pearson correlation coefficient	Simple linear regression; p=0.0316, r2=0.035
	KO-KO	68	Social interaction time vs Theta Pearson correlation coefficient	Simple linear regression; p=0.3294 r2=0.014
d	WT-WT Within vs Between	35	Theta Pearson correlation coefficient	Wilcoxon; p<0.0001
	WT-KO Within vs Between	66	Theta Pearson correlation coefficient	Wilcoxon; p<0.0001
	KO-KO Within vs Between	34	Theta Pearson correlation coefficient	Wilcoxon; p=0.5965
e	WT-WT Direct Interaction vs Solitary	24	Theta Pearson correlation coefficient	Wilcoxon; p=0.002
	WT-KO Direct Interaction vs Solitary	24	Theta Pearson correlation coefficient	Paired t-test; p=0.001
	KO-KO Direct Interaction vs Solitary	8	Theta Pearson correlation coefficient	Paired t-test; p=0.712
f	WT-WT Social vs Non-social vs Rest vs Velocity	33	Theta Pearson correlation coefficient	Repeated measures one-way ANOVA, At the 0.001 level, the population means are significantly different, p<0.0001, F(2.435,77.91)=25.73, Tukey posthoc comparisons; Social vs NonSocial p=0.0099, Social vs Rest p=0.0043, Social vs Velocity p<0.0001; NonSocial vs Rest = 0.9996, NonSocial vs Velocity p<0.0001, Rest vs Velocity p<0.0001
	WT-KO Social vs Non-social vs Rest vs Velocity	61	Theta Pearson correlation coefficient	Friedman; p<0.0001, Dunn's multiple comparisons; Social vs NonSocial p=0.1239, Social vs Rest p=0.0302, Social vs Velocity p<0.0001; NonSocial vs Rest p>0.9999, NonSocial vs Velocity p<0.0001, Rest vs Velocity p=0.0001
	KO-KO Social vs Non-social vs Rest vs Velocity	26	Theta Pearson correlation coefficient	Friedman; p=0.0123, Dunn's multiple comparisons; Social vs NonSocial p=0.5140, Social vs Rest p>0.999, Social vs Velocity p=0.0076; NonSocial vs Rest p>0.9999, NonSocial vs Velocity p=0.7957, Rest vs Velocity p=0.1901
Figure 3
Number	Comparison	N	Parameter	Statistical tests and significance
b	WT vs KO	16,14	social gaze time	unpaired t-test, p=0.085
	Trial type (WT-WT, WT-KO, KO-KO, KO-WT)	WT-WT: 70, WT-KO:73, KO-KO:80, KO-WT: 73	social interaction time	Two-way ANOVA; Main effect of self-genotype p=0.0091 Main effect of the other genotype p=0.0941; Main effect of self x other p=0.0479,Tukey posthoc comparisons;WT>WT vs WT>KO p=0.9700, WT>WT vs KO>WT p=0.9965, WT>WT vs KO>KO p=0.0127, WT>KO vs KO>WT p=0.9102, WT>KO vs KO>KO p=0.0455, KO>WT vs KO>KO p=0.0061
c	WT-WT	35	Theta Pearson correlation coefficient vs time	Simple linear regression; p=0.368 r2=0.102
	WT-WT	35	Social behavior time vs time	Simple linear regression; p=0.001 r2=0.769
	WT-WT	35	Social gaze time vs time	Simple linear regression; p=0.007 r2=0.621
	WT-KO	66	Theta Pearson correlation coefficient vs time	Simple linear regression; p=0.041 r2=0.425
	WT-KO	66	Social behavior time vs time	Simple linear regression; p<0.001 r2=0.813
	WT-KO	66	Social gaze time vs time	Simple linear regression; p<0.001 r2=0.818
	KO-KO	34	Theta Pearson correlation coefficient vs time	Simple linear regression; p=0.046 r2=0.410
	KO-KO	34	Social behavior time vs time	Simple linear regression; p=0.004 r2=0.670
	KO-KO	34	Social gaze time vs time	Simple linear regression; p=0.203 r2=0.194
d	Trial type (WT-WT, WT-KO, KO-KO, KO-WT)	WT-WT: 70, WT-KO:73, KO-KO:80, KO-WT: 73	first two minutes of Pearson correlation coefficient	Kruskal Wallis;p=0.5823
	Trial type (WT-WT, WT-KO, KO-KO, KO-WT)	WT-WT: 70, WT-KO:73, KO-KO:80, KO-WT: 73	last two minutes of Pearson correlation coefficient	Kruskal Wallis;p=0.0167, Dunn's multple comparisons; WT-WT vs WT-KO p=0.0691, WT-WT vs KO-KO p=0.02, WT-KO vs KO-KO p>0.999
e	KO-WT vs KO-KO	14	entire 10 mintues of Pearson correlation coefficient	Wilcoxon; p=0.5703
f	KO-WT	14	first two minutes vs last two minutes of Pearson correlation coefficient	Paired t-test; p=0.0576
	KO-KO	14	first two minutes vs last two minutes of Pearson correlation coefficient	Wilcoxon; p=0.0245
Figure 4
Number	Comparison	N	Parameter	Statistical tests and significance
a	WT neurons vs KO neurons	WT(882, 138) KO( 831, 42)	Distribution of social vs non-social neuron	Fisher's exact test; p<0.0001
b	WT neurons vs KO neurons	WT(969, 51) KO( 839, 34)	Distribution of social vs non-social neuron	Fisher's exact test; p=0.2667
c	WT social cell vs non-social cell	Social=138, NonSocial = 882	Pearson correlation coefficient of spike density functions	Mann-Whitney; p=0.0012
	KO social cell vs non-social cell	Social = 42, NonSocial = 831	Pearson correlation coefficient of spike density functions	Mann-Whitney; p=0.0498
d	WT social cell vs non-social cell	Social=51, NonSocial=969	Pearson correlation coefficient of spike density functions	Mann-Whitney; p=0.005
	KO social cell vs non-social cell	Social=34, NonSocial=839	Pearson correlation coefficient of spike density functions	Mann-Whitney; p=0.0262
e	WT vs KO	WT(self = 116, other = 29, overlap = 22), KO(self = 37, other = 29, overlap = 5)	Number of neurons	Chi square; p=0.0005
g	WT Theta vs Beta vs Low gamma	Theta=62, Beta=12, LowGamma=17	Unit vector lengths of WT social neurons	Kruskal Wallis; p<0.0001, Dunn's multiple comparisons; Theta vs Beta p=0.0071, Theta vs Low Gamma p=0.0004, Beta vs Low Gamma p>0.999
	KO Theta vs Beta vs Low gamma	Theta=16, Beta=6, LowGamma=16	Unit vector lengths of KO social neurons	Kruskal Wallis; p=0.0081, Dunn's multiple comparisons; Theta vs Beta p>0.999, Theta vs Low Gamma p=0.0070, Beta vs Low Gamma p=0.2831
i	WT Theta vs Beta vs Low gamma	Theta=23, Beta=6 ,LowGamma=8	Unit vector lengths of WT social neurons	Kruskal Wallis; p=0.775
	KO Theta vs Beta vs Low gamma	Theta=7, Beta=5,LowGamma=4	Unit vector lengths of KO social neurons	Kruskal Wallis; p=0.0592
j	WT vs KO	WT(self=68, other=14, overlap=23), KO(self=33, other=11,overlap= 5)	Distribution of self vs other phase locked neuron	Chi square; p=0.0363
Figure 5
Number	Comparison	N	Parameter	Statistical tests and significance
b	WT	4	Behavior distribution across epochs	Chi square; p<0.0001
	KO	4	Behavior distribution across epochs	Chi square; p<0.0001
c	Epoch condition, Genotype	WT 4, KO 4	Social interaction times	Repeated measuresTwo-way ANOVA; Main effect of genotype p=0.6877, F(1,84)=0.1627,Main effect of the epoch condition p<0.0001, F(1.543,129.6)=79.15, Main effect of genotype and epoch condition p<0.0001, F(2,168) = 11.85, Main effect of subject p=0.0001, F(84,168) = 1.942, Tukey posthoc comparisons; WT: NoStim vs Sync p=0.0129, NoStim vs Desync p=0.0117, Sync vs Desync p<0.0001, KO: NoStim vs Sync …
d	Sync condition, Genotype	WT 4, KO 4	Social interaction times	Repeated measuresTwo-way ANOVA; Main effect of genotype p=0.9533, F(1,41)=0.00034,Main effect of the sync condition p<0.0001, F(2,82)=35.79, Main effect of genotype and epoch condition p=0.0005, F(2,82) = 8.464, Main effect of subject p=0.1047, F(41,82) = 0.1047, Uncorrected Fisher's LSD; WT: NoStim vs Sync p=0.0291, NoStim vs Desync p=0.3744, Sync vs Desync p=0.0025, KO: NoStim vs Sync p<0.0001,…
e	WT-WT NoStim vs Sync vs Desync	24	Bi-sniffing time	Friedman; p=0.0281, Dunn's multiple comparisons; NoStim vs Sync p=0.5443, NoStim vs Desync p=0.5443, Sync vs Desync p=0.0226
	KO-KO NoStim vs Sync vs Desync	24	Bi-sniffing time	Friedman; p<0.0001, Dunn's multiple comparisons; NoStim vs Sync p=0.0166, NoStim vs Desync p=0.0043, Sync vs Desync p<0.0001
	WT-KO NoStim vs Sync vs Desync	15	Bi-sniffing time	Friedman; p=0.0007, Dunn's multiple comparisons; NoStim vs Sync p=0.0240, NoStim vs Desync p=0.8865, Sync vs Desync p=0.0006
	KO-WT NoStim vs Sync vs Desync	15	Bi-sniffing time	Friedman; p=0.0011, Dunn's multiple comparisons; NoStim vs Sync p=0.0080, NoStim vs Desync p>0.9999, Sync vs Desync p=0.0023
f	WT-WT NoStim vs Sync vs Desync	24	Pearson correlation coefficient	Friedman; p=0.0003, Dunn's multiple comparisons; NoStim vs Sync p>0.999, NoStim vs Desync p=0., Sync vs Desync p=0.0226
	KO-KO NoStim vs Sync vs Desync	24	Pearson correlation coefficient	Friedman; p<0.0001, Dunn's multiple comparisons; NoStim vs Sync p=0.0166, NoStim vs Desync p=0.0005, Sync vs Desync p<0.0045
	WT-KO NoStim vs Sync vs Desync	30	Pearson correlation coefficient	Friedman; p=0.8752
Extended Data Figure 1
Number	Comparison	N	Parameter	Statistical tests and significance
b	WT-WT Within vs Between	35	Beta Pearson correlation coefficient	Wilcoxon; p<0.0001
	WT-KO Within vs Between	66	Beta Pearson correlation coefficient	Wilcoxon; p<0.0001
	KO-KO Within vs Between	34	Beta Pearson correlation coefficient	Wilcoxon; p=0.3765
c	WT-WT Direct Interaction vs Solitary	24	Beta Pearson correlation coefficient	Wilcoxon; p=0.2643
	WT-KO Direct Interaction vs Solitary	24	Beta Pearson correlation coefficient	Wilcoxon; p=0.128
	KO-KO Direct Interaction vs Solitary	8	Beta Pearson correlation coefficient	Wilcoxon; p=0.1484
d	WT-WT Social vs Non-social vs Rest vs Velocity	33	Beta Pearson correlation coefficient	Friedman; p<0.0001, Dunn's multiple comparisons; Social vs NonSocial p>0.9999, Social vs Rest p>0.9999, Social vs Velocity p<0.0001; NonSocial vs Rest p>0.9999, NonSocial vs Velocity p<0.0001, Rest vs Velocity p<0.0001
	WT-KO Social vs Non-social vs Rest vs Velocity	61	Beta Pearson correlation coefficient	Friedman; p<0.0001, Dunn's multiple comparisons; Social vs NonSocial p=0.4095, Social vs Rest p=0.1489, Social vs Velocity p<0.0001; NonSocial vs Rest p>0.9999, NonSocial vs Velocity p<0.0001, Rest vs Velocity p=0.0001
	KO-KO Social vs Non-social vs Rest vs Velocity	26	Beta Pearson correlation coefficient	Friedman; p<0.0001, Dunn's multiple comparisons; Social vs NonSocial p>0.9999, Social vs Rest p>0.9999, Social vs Velocity p<0.0001; NonSocial vs Rest p>0.9999, NonSocial vs Velocity p=0.0114, Rest vs Velocity p=0.0012
e	WT-WT Within vs Between	35	Low gamma Pearson correlation coefficient	Wilcoxon; p<0.0001
	WT-KO Within vs Between	66	Low gamma Pearson correlation coefficient	Wilcoxon; p<0.0001
	KO-KO Within vs Between	34	Low gamma Pearson correlation coefficient	Wilcoxon; p=0.1716
f	WT-WT Direct Interaction vs Solitary	24	Low gamma Pearson correlation coefficient	Wilcoxon; p=0.3305
	WT-KO Direct Interaction vs Solitary	24	Low gamma Pearson correlation coefficient	Wilcoxon; p=0.16
	KO-KO Direct Interaction vs Solitary	8	Low gamma Pearson correlation coefficient	Wilcoxon; p=0.8438
g	WT-WT Social vs Non-social vs Rest vs Velocity	33	Low gamma Pearson correlation coefficient	Friedman; p<0.0001, Dunn's multiple comparisons; Social vs NonSocial p=0.916, Social vs Rest p>0.9999, Social vs Velocity p<0.0001; NonSocial vs Rest p>0.9999, NonSocial vs Velocity p<0.0001, Rest vs Velocity p<0.0001
	WT-KO Social vs Non-social vs Rest vs Velocity	61	Low gamma Pearson correlation coefficient	Friedman; p<0.0001, Dunn's multiple comparisons; Social vs NonSocial p>0.9999, Social vs Rest p=0.1489, Social vs Velocity p<0.0001; NonSocial vs Rest p=0.845, NonSocial vs Velocity p<0.0001, Rest vs Velocity p<0.0001
	KO-KO Social vs Non-social vs Rest vs Velocity	26	Low gamma Pearson correlation coefficient	Friedman; p<0.0001, Dunn's multiple comparisons; Social vs NonSocial p>0.9999, Social vs Rest p>0.9999, Social vs Velocity p=0.0008; NonSocial vs Rest p>0.9999, NonSocial vs Velocity p=0.0114, Rest vs Velocity p=0.0008
h.Left	Trial type (WT-WT, WT-KO, KO-KO)	WT-WT: 33, WT-KO:61, KO-KO:26)	Theta Pearson correlation coefficient	Kruskal Wallis; p=0.0422; Dunn's multipe comparisons; WT-WT vs WT-KO p=0.5024, WT-WT vs KO-KO p=0.0356, WT-KO vs KO-KO p=0.3717
h.Middle	Trial type (WT-WT, WT-KO, KO-KO)	WT-WT: 33, WT-KO:61, KO-KO:26)	Beta Pearson correlation coefficient	Kruskal Wallis; p=0.0302; Dunn's multipe comparisons; WT-WT vs WT-KO p>0.9999, WT-WT vs KO-KO p=0.0606, WT-KO vs KO-KO p=0.0606
h.Right	Trial type (WT-WT, WT-KO, KO-KO)	WT-WT: 33, WT-KO:61, KO-KO:26)	Low gamma Pearson correlation coefficient	Brown-Forsythe; p=0.0746, F(2,119) = 0.7893, Ordinary one way ANOVA; p=0.0696, F(2,61.75) = 2.725,
i	WT-WT	70	Social interaction time vs 4-100 Pearson correlation coefficient	Simple linear regression; p=0.0284, r2=0.0687
	WT-KO	132	Social interaction time vs 4-100 Pearson correlation coefficient	Simple linear regression; p=0.0474, r2=0.029
	KO-KO	68	Social interaction time vs 4-100 Pearson correlation coefficient	Simple linear regression; p=0.35 r2=0.0132
j	WT-WT	70	Bi-sniffing time vs 4-100 Pearson correlation coefficient	Simple linear regression; p=0.0404, r2=0.06031
	WT-KO	132	Bi-sniffing time vs 4-100 Pearson correlation coefficient	Simple linear regression; p=0.6147, r2=0.002
	KO-KO	68	Bi-sniffing time vs 4-100 Pearson correlation coefficient	Simple linear regression; p=0.015, r2=0.0858
Extended Data Figure 2
Number	Comparison	N	Parameter	Statistical tests and significance
a	WT-WT	70	Social interaction time vs Social gaze time	Simple linear regression; p=0.0368, r2=0.0644
	WT-KO	132	Social interaction time vs Social gaze time	Simple linear regression; p=0.07, r2=0.0266
	KO-KO	68	Social interaction time vs Social gaze time	Simple linear regression; p=0.9803, r2<0.0001
b	WT-WT Gaze vs NoGaze vs Angle	33	Theta Pearson correlation coefficient	Friedman; p<0.0001, Dunn's multiple comparisons; Gaze vs NoGaze p<0.0001, Gaze vs Angle p=0.058, NoGaze vs Angle p=0.1467
	WT-KO Gaze vs NoGaze vs Angle	61	Theta Pearson correlation coefficient	Friedman; p<0.0001, Dunn's multiple comparisons; Gaze vs NoGaze p<0.0001, Gaze vs Angle p=0.1718, NoGaze vs Angle p=0.0198
	KO-KO Gaze vs NoGaze vs Angle	26	Theta Pearson correlation coefficient	Friedman; p=0.0052, Dunn's multiple comparisons; Gaze vs NoGaze p=0.004, Gaze vs Angle p=0.6873, NoGaze vs Angle p=0.1351
c	WT-WT Gaze vs NoGaze vs Angle	33	Beta Pearson correlation coefficient	Friedman; p<0.0001, Dunn's multiple comparisons; Gaze vs NoGaze p<0.0001, Gaze vs Angle p<0.0001, NoGaze vs Angle p>0.9999
	WT-KO Gaze vs NoGaze vs Angle	61	Beta Pearson correlation coefficient	Friedman; p<0.0001, Dunn's multiple comparisons; Gaze vs NoGaze p<0.0001, Gaze vs Angle p=0.0557, NoGaze vs Angle p=0.0002
	KO-KO Gaze vs NoGaze vs Angle	26	Beta Pearson correlation coefficient	Friedman; p<0.0001, Dunn's multiple comparisons; Gaze vs NoGaze p<0.0001, Gaze vs Angle p=0.0063, NoGaze vs Angle p=0.4247
d	WT-WT Gaze vs NoGaze vs Angle	33	Low gamma Pearson correlation coefficient	Friedman; p<0.0001, Dunn's multiple comparisons; Gaze vs NoGaze p=0.0007, Gaze vs Angle p<0.0001, NoGaze vs Angle p>0.9999
	WT-KO Gaze vs NoGaze vs Angle	61	Low gamma Pearson correlation coefficient	Friedman; p<0.0001, Dunn's multiple comparisons; Gaze vs NoGaze p<0.0001, Gaze vs Angle p=0.0017, NoGaze vs Angle p=0.0017
	KO-KO Gaze vs NoGaze vs Angle	26	Low gamma Pearson correlation coefficient	Friedman; p<0.0001, Dunn's multiple comparisons; Gaze vs NoGaze p<0.0001, Gaze vs Angle p=0.015, NoGaze vs Angle p=0.1351
Extended Data Figure 3
Number	Comparison	N	Parameter	Statistical tests and significance
b	WT Baseline vs Solitary vs Direct Interaction	835	Putative excitatory neuron firing rates	Friedman; p<0.0001, Dunn's multiple comparisons; Baseline vs Solitary p<0.0001, Baseline vs Direct Interaction p<0.0001, Solitary vs Direct Interaction p=0.0017
	KO Baseline vs Solitary vs Direct Interaction	555	Putative excitatory neuron firing rates	Friedman; p=0.0267, Dunn's multiple comparisons; Baseline vs Solitary p>0.9999, Baseline vs Direct Interaction p=0.0248, Solitary vs Direct Interaction p=0.2297
	WT Baseline vs Solitary vs Direct Interaction	87	Putative inhibitory neuron firing rates	Friedman; p=0.0029, Dunn's multiple comparisons; Baseline vs Solitary p=0.0073, Baseline vs Direct Interaction p=0.0119, Solitary vs Direct Interaction p>0.9999
	KO Baseline vs Solitary vs Direct Interaction	37	Putative inhibitory neuron firing rates	Friedman; p=0.0002, Dunn's multiple comparisons; Baseline vs Solitary p=0.7351, Baseline vs Direct Interaction p=0.0001, Solitary vs Direct Interaction p=0.011
c	WT Social vs NonSocial vs Rest	835	Putative excitatory neuron burst proportion	Friedman; p<0.0001, Dunn's multiple comparisons; Social vs NonSocial p<0.0001, Social vs Rest p<0.0001, NonSocial vs Rest p>0.9999
	KO Social vs NonSocial vs Rest	555	Putative excitatory neuron burst proportion	Friedman; p<0.0001, Dunn's multiple comparisons; Social vs NonSocial p<0.0001, Social vs Rest p=0.5082, NonSocial vs Rest p<0.0001
	WT Social vs NonSocial vs Rest	87	Putative inhibitory neuron burst proportion	Friedman; p=0.0024, Dunn's multiple comparisons; Social vs NonSocial p=0.6392, Social vs Rest p=0.088, NonSocial vs Rest p=0.0019
	KO Social vs NonSocial vs Rest	37	Putative inhibitory neuron burst proportion	Friedman; p=0.0014, Dunn's multiple comparisons; Social vs NonSocial p>0.9999, Social vs Rest p=0.0056, NonSocial vs Rest p=0.0056
Extended Data Figure 4
Number	Comparison	N	Parameter	Statistical tests and significance
b	WT vs KO	189, 71	Distribution of self-LFP phase locked cell during direct interaction	Chi square test; p=0.0195
d	WT vs KO	189, 71	Distribution of other-LFP phase locked cell during direct interaction	Fisher's exact test; p=0.4705
e	WT vs KO	100, 18	Distribution of self-LFP phase locked cell during solitary session	Fisher's exact test; p=0.0733
Extended Data Figure 5
Number	Comparison	N	Parameter	Statistical tests and significance
b	WT vs KO	4,4	Social interaction time(s) across experimental sessions	Simple linear regression; WT: p=0.107, r2=0.239, KO: p=0.575, r2=0.032
c	WT-WT NoStim vs Sync vs Desync	24	Social interaction time	Friedman; p=0.0153, Dunn's multiple comparisons; NoStim vs Sync p>0.9999, NoStim vs Desync p=0.1351, Sync vs Desync p=0.015
	KO-KO NoStim vs Sync vs Desync	24	Social interaction time	Friedman; p<0.0001, Dunn's multiple comparisons; NoStim vs Sync p=0.0016, NoStim vs Desync p=0.0068, Sync vs Desync p<0.0001
	WT-KO NoStim vs Sync vs Desync	15	Social interaction time	Friedman; p=0.0001, Dunn's multiple comparisons; NoStim vs Sync p=0.1017, NoStim vs Desync p=0.1017, Sync vs Desync p<0.0001
	KO-WT NoStim vs Sync vs Desync	15	Social interaction time	Friedman; p<0.0001, Dunn's multiple comparisons; NoStim vs Sync p=0.014, NoStim vs Desync p=0.2313, Sync vs Desync p<0.0001
d	WT-WT NoStim vs Sync vs Desync	24	Active social behavior time	Friedman; p=0.0050, Dunn's multiple comparisons; NoStim vs Sync p>0.9999, NoStim vs Desync p=0.0693, Sync vs Desync p=0.0051
	KO-KO NoStim vs Sync vs Desync	24	Active social behavior time	Friedman; p<0.0001, Dunn's multiple comparisons; NoStim vs Sync p=0.0016, NoStim vs Desync p=0.0795, Sync vs Desync p<0.0001
	WT-KO NoStim vs Sync vs Desync	15	Active social behavior time	Friedman; p=0.0164, Dunn's multiple comparisons; NoStim vs Sync p=0.7516, NoStim vs Desync p=0.2792, Sync vs Desync p=0.0140
	KO-WT NoStim vs Sync vs Desync	15	Active social behavior time	Friedman; p<0.0001, Dunn's multiple comparisons; NoStim vs Sync p=0.0012, NoStim vs Desync p>0.9999, Sync vs Desync p<0.0001
e	WT-WT NoStim vs Sync vs Desync	24	Theta oscillation power	Friedman; p=0.223
	KO-KO NoStim vs Sync vs Desync	24	Theta oscillation power	Friedman; p=0.0039, Dunn's multiple comparisons; NoStim vs Sync p=0.1818, NoStim vs Desync p=0.4467, Sync vs Desync p=0.0027
	WT-KO NoStim vs Sync vs Desync	30	Theta oscillation power	Friedman; p=0.1767
f	WT-WT NoStim vs Sync vs Desync	24	4-100 Pearson correlation coefficient	Friedman; p=0.0057, Dunn's multiple comparisons; NoStim vs Sync p=0.7446, NoStim vs Desync p=0.0045, Sync vs Desync p=0.1299
	KO-KO NoStim vs Sync vs Desync	24	4-100 Pearson correlation coefficient	Friedman; p<0.0001, Dunn's multiple comparisons; NoStim vs Sync p<0.0001, NoStim vs Desync p=0.4467, Sync vs Desync p=0.0045
	WT-KO NoStim vs Sync vs Desync	30	4-100 Pearson correlation coefficient	Friedman; p=0.3932
g	WT-WT NoStim vs Sync vs Desync	24	Beta Pearson correlation coefficient	Friedman; p=0.0302, Dunn's multiple comparisons; NoStim vs Sync p=0.0281, NoStim vs Desync p=0.2498, Sync vs Desync p>0.9999
	KO-KO NoStim vs Sync vs Desync	24	Beta Pearson correlation coefficient	Friedman; p=0.6065
	WT-KO NoStim vs Sync vs Desync	30	Beta Pearson correlation coefficient	Friedman; p=0.016, Dunn's multiple comparisons; NoStim vs Sync p=0.9051, NoStim vs Desync p=0.2121, Sync vs Desync p=0.0135
g	WT-WT NoStim vs Sync vs Desync	24	Low gamma Pearson correlation coefficient	Friedman; p=0.3114
	KO-KO NoStim vs Sync vs Desync	24	Low gamma Pearson correlation coefficient	Friedman; p=0.8465
	WT-KO NoStim vs Sync vs Desync	30	Low gamma Pearson correlation coefficient	Friedman; p=0.6703
Extended Data Figure 6
Number	Comparison	N	Parameter	Statistical tests and significance
a	WT vs KO	WT(20),KO(7)	proportion of social neurons during NoStim epoch	Fisher's exact test; p=0.002
	WT vs KO	WT(10), KO(16)	proportion of social neurons during Sync epoch	Fisher's exact test; p=0.688
	No Stim vs Sync	WT (NoStim=20, Sync=10), KO (NoStim=7, Sync=16)	proportion of social neurons during NoStim and Sync epoch	McNemar's test; WT p=0.058, KO p=0.060
